# Supplementary material for: Downregulation of miR‐133b predict progression and poor prognosis in patients with urothelial carcinoma of bladder
Source: PubMed Central journal article supplement (PMC4971914; doi:10.1002/cam4.777), 2016-06-12

Figure S1

A

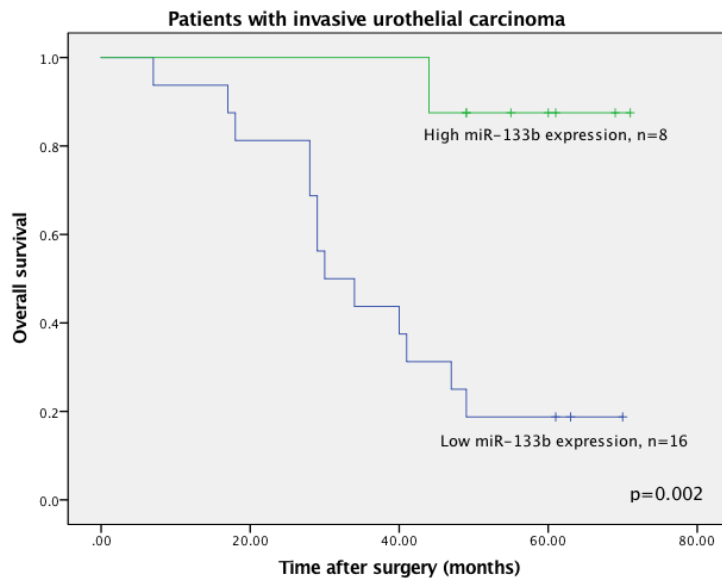

B

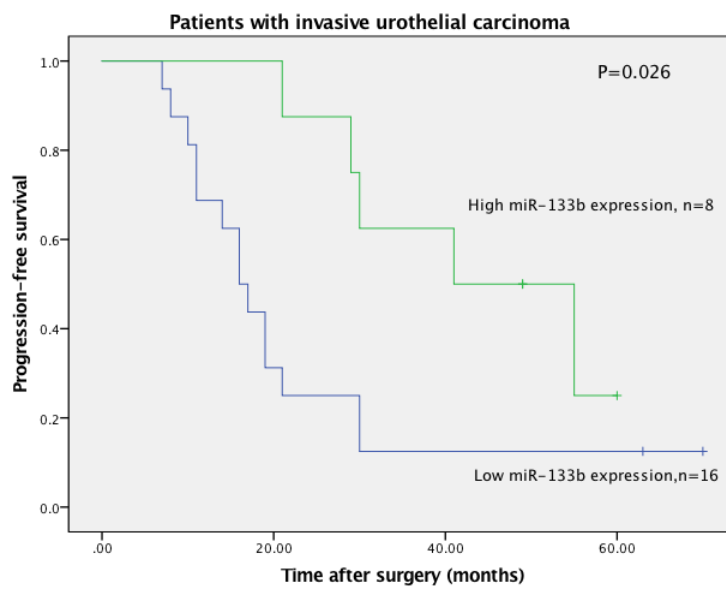

Supplement: CAM4-5-1856-s002.pdf [file CAM4-5-1856-s002.pdf]
